# Supplementary material
Source: publisher site journal article supplement (https://www.dovepress.com/article/550742)
Supplement: Supplementary file 1 [file 550742_Supplementary%20file%201_2.docx]

# **Supplementary file 1**

# **Search Strategy and Results**

**Number of citations by each database and trial register searched***

| **Databases and Trial registers** | **Citations** |
| --- | --- |
| **Databases：** |  |
| UpToDate | 4 |
| Guidelines International Network | 7 |
| National Institute for Health and Care Excellence | 2 |
| Cochrane Library | 16 |
| Joanna Briggs Institute | 6 |
| Embase | 2561 |
| Web of Science | 1492 |
| Pubmed | 1079 |
| CNKI | 51 |
| **Total (databases)** | **5218** |

**Full search strategy for each database**

**Cochrane Library**

#1 MeSH descriptor: [Arthroplasty, Replacement, Knee] explode all trees

#2 MeSH descriptor: [Arthroplasty, Replacement] explode all trees

#3 MeSH descriptor: [Arthroplasty] explode all trees

#4 ("arthroplasty"):ti,ab,kw OR (Arthroplasty, Replacement, Knee):ti,ab,kw OR (arthroplasty, replacement):ti,ab,kw OR (joint knee replacement):ti,ab,kw OR (total knee replacement):ti,ab,kw (Word variations have been searched)

#5 (total knee arthroplasty):ti,ab,kw OR (knee arthroplasty):ti,ab,kw OR (knee replacement):ti,ab,kw OR (TKA):ti,ab,kw OR (TKR):ti,ab,kw (Word variations have been searched)

#6 (arthroplasty, knee replacement):ti,ab,kw OR (knee replacement arthroplasty):ti,ab,kw OR (knee arthroplasty, total):ti,ab,kw OR (arthroplasty, total knee):ti,ab,kw OR (replacement, total knee):ti,ab,kw (Word variations have been searched)

#7 (replacement arthroplasty, knee):ti,ab,kw OR (arthroplasty, knee):ti,ab,kw OR (knee replacement, total):ti,ab,kw OR (replacement*, joint):ti,ab,kw OR (total joint replacement):ti,ab,kw (Word variations have been searched

#8 (replacement arthroplasty):ti,ab,kw OR (replacement, total joint):ti,ab,kw (Word variations have been searched)

#9 #1 OR #2 OR #3 OR #4 OR #5 OR #6 OR #7 OR #8

#10 MeSH descriptor: [Exercise] explode all trees

#11 MeSH descriptor: [Exercise Therapy] explode all trees

#12 MeSH descriptor: [Rehabilitation] explode all trees

#13 MeSH descriptor: [Motor Activity] explode all trees

#14 (exercise therap*):ti,ab,kw OR (exercise):ti,ab,kw OR (rehabilitation):ti,ab,kw OR (motor activity):ti,ab,kw OR (early rehabilitation):ti,ab,kw (Word variations have been searched) 181596

#15 (rapid recovery):ti,ab,kw OR (enhanced recovery):ti,ab,kw OR (fast-track rehabilitation):ti,ab,kw OR (discharged rehabilitation):ti,ab,kw OR (exercise training):ti,ab,kw (Word variations have been searched)

#16 (therapy, exercise):ti,ab,kw OR (rehabilitation exercise*):ti,ab,kw OR (exercise*, rehabilitation):ti,ab,kw OR (physical activity):ti,ab,kw (Word variations have been searched)

#17 #10 OR #11 OR #12 OR #13 OR #14 OR #15 OR #16

#18 #9 AND #17

#19 (Systematic Review):ti,ab,kw

#20 #18 AND #19

**EMBASE**

#1 'arthroplasty'/exp

#2 'knee replacement'/exp

#3 arthroplasty:ab,ti OR 'arthroplasty, replacement, knee':ab,ti OR 'arthroplasty, replacement joint':ab,ti OR 'total knee replacement':ab,ti OR 'total knee arthroplasty':ab,ti OR 'knee arthroplasty':ab,ti OR 'knee replacement':ab,ti OR tka:ab,ti OR tkr:ab,ti OR 'arthroplasty, knee replacement':ab,ti OR 'knee replacement arthroplasty':ab,ti OR 'knee arthroplasty, total':ab,ti OR 'arthroplasty, total knee':ab,ti OR 'replacement, total knee':ab,ti OR 'replacement arthroplasty, knee':ab,ti OR 'arthroplasty, knee':ab,ti OR 'knee replacement, total':ab,ti OR 'replacement*, joint':ab,ti OR 'total joint replacement':ab,ti OR 'replacement arthroplasty':ab,ti OR 'replacement, total joint':ab,ti

#4 #1 OR #2 OR #3

#5 'kinesiotherapy'/exp

#6 'exercise'/exp

#7 'rehabilitation'/exp

#8 'motor activity'/exp

#9 'enhanced recovery'/exp

#10 'physical activity'/exp

#11 kinesiotherapy:ab,ti OR exercise:ab,ti OR rehabilitation:ab,ti OR 'motor activity':ab,ti OR 'early rehabilitation':ab,ti OR 'rapid recovery':ab,ti OR 'fast-track rehabilitation':ab,ti OR 'enhanced recovery':ab,ti OR 'discharged rehabilitation':ab,ti OR 'exercise training':ab,ti OR 'therapy, exercise':ab,ti OR 'rehabilitation exercise*':ab,ti OR 'exercise*, rehabilitation':ab,ti OR 'physical activity':ab,ti

#12 #5 OR #6 OR #7 OR #8 OR #9 OR #10 OR #11

#13 'meta analysis'/exp

#14 'guideline'/exp

#15 'evidence synthesis'/exp

#16 'systematic review'/exp

#17 'practice guideline'/exp

#18 'consensus'/exp

#19 'randomized controlled trial'/exp

#20 'meta analysis':ab,ti OR guideline:ab,ti OR 'evidence synthesis':ab,ti OR 'systematic review':ab,ti OR 'practice guideline':ab,ti OR 'clinical practice guideline':ab,ti OR consensus:ab,ti OR 'randomized controlled trial':ab,ti OR rct:ab,ti

#21 #13 OR #14 OR #15 OR #16 OR #17 OR #18 OR #19 OR #20

#22 #4 AND #12

#23 #21 AND #22

**Web of science**

#1 TS=((((((((((((((((((((((arthroplasty) OR (arthroplasty, replacement, knee)) OR (arthroplasty, replacement)) OR (joint knee replacement)) OR (total knee replacement)) OR (total knee arthroplasty)) OR (knee arthroplasty)) OR (knee replacement)) OR (TKA)) OR (TKR)) OR (arthroplasty, knee replacement)) OR (knee replacement arthroplasty)) OR (knee arthroplasty, total)) OR (arthroplasty, total knee)) OR (replacement, total knee)) OR (replacement arthroplasty, knee)) OR (arthroplasty, knee)) OR (knee replacement, total)) OR (replacement*, joint)) OR (total joint replacement)) OR (replacement arthroplasty)) OR (replacement, total joint))

#2 TS=((((((((((((((exercise therap*) OR (exercise)) OR (rehabilitation)) OR (motor activity)) OR (early rehabilitation)) OR (rapid recovery)) OR (enhanced recovery)) OR (fast-track rehabilitation)) OR (discharged rehabilitation)) OR (exercise training)) OR (therapy, exercise)) OR (rehabilitation exercise*)) OR (exercise*, rehabilitation)) OR (physical activity))

#3 #2 AND #1

#4 TS=(((((((((meta-analysis) OR (guideline)) OR (evidence synthesis)) OR (systematic review)) OR (practice guideline)) OR (Clinical Practice Guideline)) OR (consensus)) OR (Randomized Controlled Trial)) OR (RCT))

#5 #3 AND #4

**Pubmed**

#1 Search: arthroplasty[MeSH Terms]

#2 Search: arthroplasty, replacement, knee[MeSH Terms]

#3 Search: arthroplasty, replacement[MeSH Terms]

#4 Search: (((((((((((((((((((((arthroplasty[Title/Abstract]) OR (arthroplasty, replacement, knee[Title/Abstract])) OR (arthroplasty, replacement[Title/Abstract])) OR (joint knee replacement[Title/Abstract])) OR (total knee replacement[Title/Abstract])) OR (total knee arthroplasty[Title/Abstract])) OR (knee arthroplasty[Title/Abstract])) OR (knee replacement[Title/Abstract])) OR (TKA[Title/Abstract])) OR (TKR[Title/Abstract])) OR (arthroplasty, knee replacement[Title/Abstract])) OR (knee replacement arthroplasty[Title/Abstract])) OR (knee arthroplasty, total[Title/Abstract])) OR (arthroplasty, total knee[Title/Abstract])) OR (replacement, total knee[Title/Abstract])) OR (replacement arthroplasty, knee[Title/Abstract])) OR (arthroplasty, knee[Title/Abstract])) OR (knee replacement, total[Title/Abstract])) OR (replacement*, joint[Title/Abstract])) OR (total joint replacement[Title/Abstract])) OR (replacement arthroplasty[Title/Abstract])) OR (replacement, total joint[Title/Abstract])

#5 #1 OR #2 OR #3 OR #4

#6 Search: exercise therapy[MeSH Terms]

#7 Search: exercise[MeSH Terms]

#8 Search: rehabilitation[MeSH Terms]

#9 Search: motor activity[MeSH Terms]

#10 Search: (((((((((((((exercise therap*[Title/Abstract]) OR (\exercise[Title/Abstract])) OR (rehabilitation[Title/Abstract])) OR (motor activity[Title/Abstract])) OR (early rehabilitation[Title/Abstract])) OR (rapid recovery[Title/Abstract])) OR (enhanced recovery[Title/Abstract])) OR (fast-track rehabilitation[Title/Abstract])) OR (discharged rehabilitation[Title/Abstract])) OR (exercise training[Title/Abstract])) OR (therapy, exercise[Title/Abstract])) OR (rehabilitation exercise*[Title/Abstract])) OR (exercise*, rehabilitation[Title/Abstract])) OR (physical activity[Title/Abstract])

#11 #6 OR #7 OR #8 OR #9 OR #10

#12 #5 AND #11

#13 Search: (((Meta-Analysis[Publication Type]) OR (Guideline[Publication Type])) OR (Systematic Review[Publication Type])) OR (Practice Guideline[Publication Type])  [338,914](https://pubmed.ncbi.nlm.nih.gov/?term=%28%28%28Meta-Analysis%5BPublication+Type%5D%29+OR+%28Guideline%5BPublication+Type%5D%29%29+OR+%28Systematic+Review%5BPublication+Type%5D%29%29+OR+%28Practice+Guideline%5BPublication+Type%5D%29&sort=pubdate)

#14 Search: ((((((((meta-analysis[Title/Abstract]) OR (guideline[Title/Abstract])) OR (evidence synthesis[Title/Abstract])) OR (systematic review[Title/Abstract])) OR (practice guideline[Title/Abstract])) OR (Clinical Practice Guideline[Title/Abstract])) OR (consensus[Title/Abstract])) OR (Randomized Controlled Trial[Title/Abstract])) OR (RCT[Title/Abstract])

#15 #13 OR #14

#16 #12 AND #15
